# Supplementary material
Source: PubMed Central journal article supplement (PMC5383577)
Supplement: mmc1.pdf [file mmc1.pdf]

YMTHE, Volume 25

## **Supplemental Information**

### **Modifying Antigen-Encapsulating Liposomes with KALA Facilitates MHC Class I Antigen Presentation and Enhances Anti-tumor Effects**

**Naoya Miura, Hidetaka Akita, Naho Tateshita, Takashi Nakamura, and Hideyoshi Harashima**

# Supplementary Figure 1.

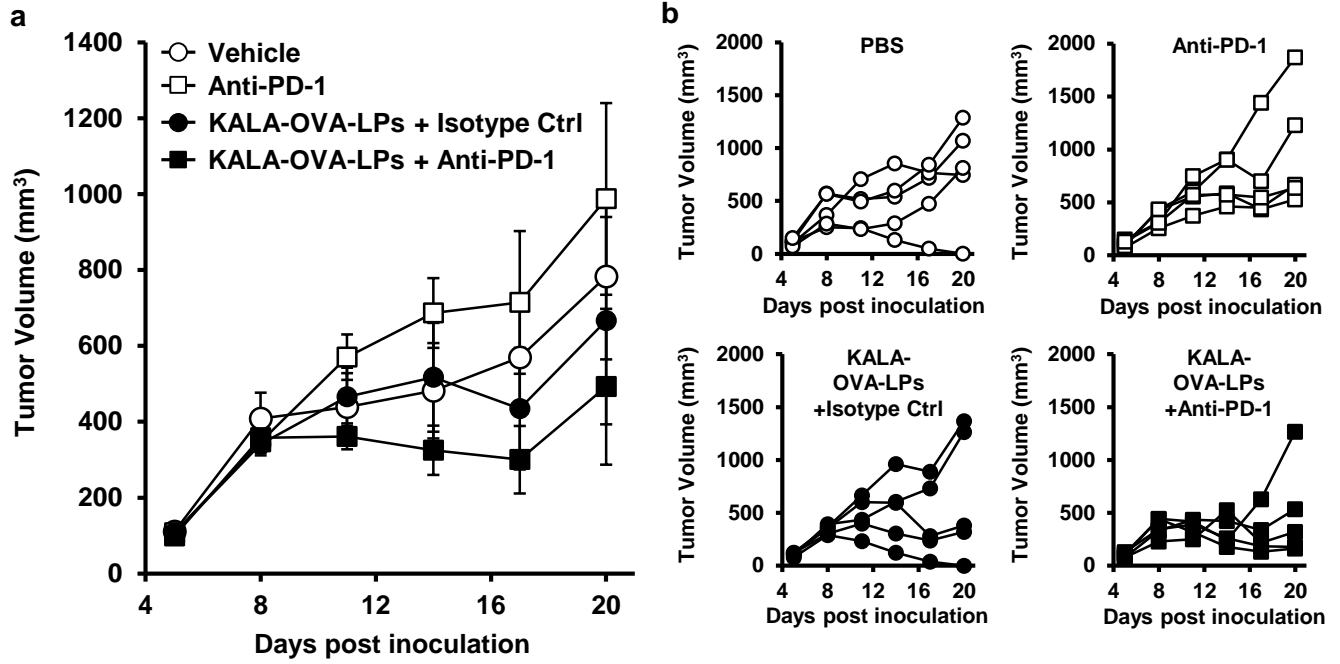

## Supplementary Figure 1. Therapeutic anti-tumor effect combined with anti-PD-1 treatment

(a) C57BL/6 mice were inoculated with  $8.0 \times 10^5$  cells of E.G7-OVA in the left flank. 5, 9, 13, 17 days after inoculation, mice were immunized subcutaneously with KALA-OVA-LPs at a dose of 25  $\mu$ g OVA. Anti-PD-1 or Isotype Ctrl antibody was also administered intraperitoneally at a dose of 50  $\mu$ g on every two days from first immunization. The tumor volume was measured up to 20 days after inoculation. The plots represent the mean  $\pm$  SEM (n = 5). (b) Tumor volume of individual mouse of each group in the experiment (a).

# Supplementary Figure 2.

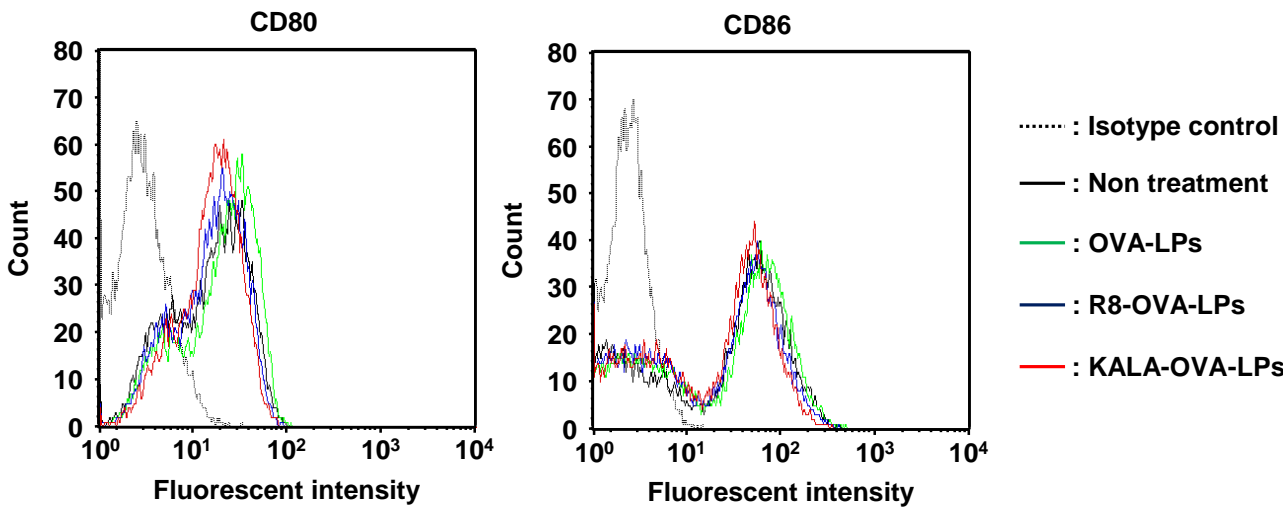

**Supplementary Figure 2.** CD80/86 expression in BMDCs that were treated with liposomes. BMDCs ( $1.0 \times 10^6$  cells) were treated with the KALA-OVA-LPs, the R8-OVA-LPs or the non-modified OVA-LPs at a lipid dose of 32  $\mu$ M. After 18 hours, the BMDCs were recovered and stained by PE-labeled anti-mouse CD80 and CD86 (Biolegend).

# Supplementary Figure 3.

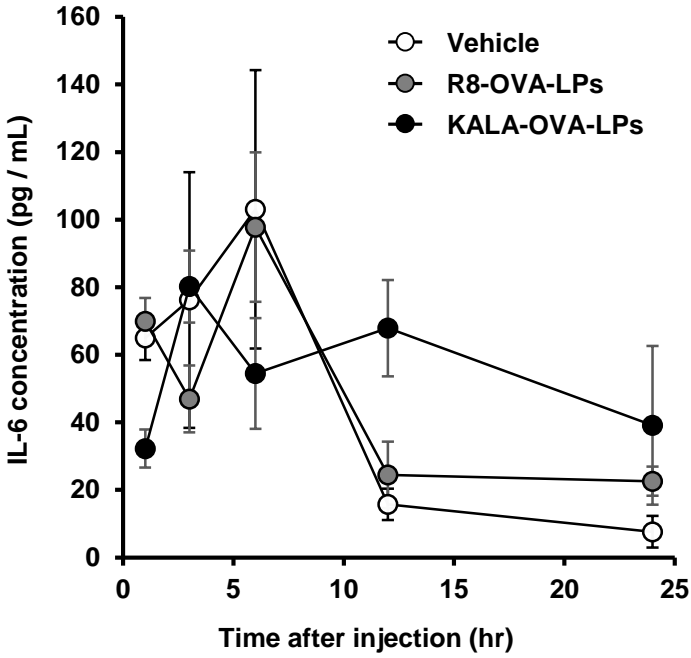

**Supplementary Figure 3.** IL-6 concentration in serum after liposome injection.

C57BL/6 mice were administered subcutaneously with KALA-OVA-LPs, R8-OVA-LPs at a dose of 25 µg OVA. Blood of these mice was collected at 1, 3, 6, 12 and 24 hrs after administration. Serum was separated from blood and the IL-6 concentration was measured by ELISA.

## Supplementary Figure 4.

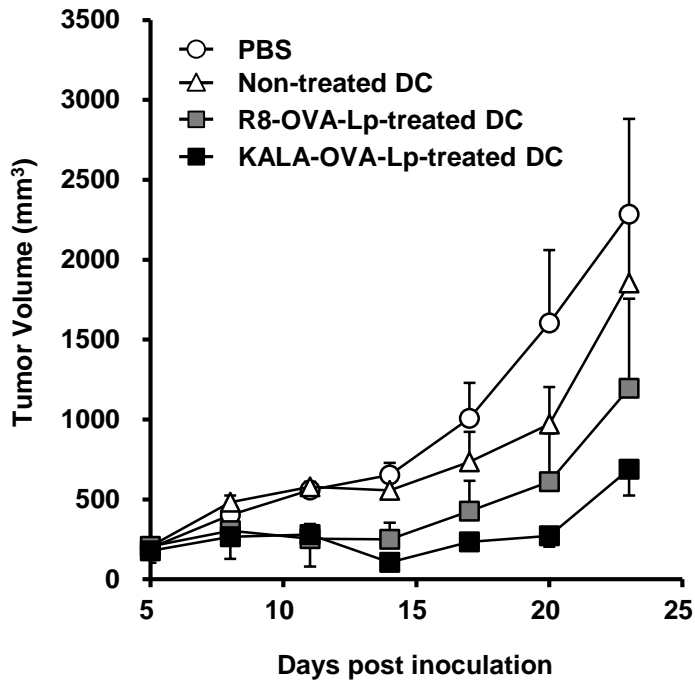

### Supplementary Figure 4. *Ex vivo* anti-tumor experiment.

BMDCs ( $1.0 \times 10^6$  cells) were treated with the KALA-OVA-LPs or R8-OVA-LPs at a lipid dose of  $32 \mu\text{M}$ . After 6 hr incubation, the BMDCs were harvested. C57BL/6 mice were immunized with  $5.0 \times 10^5$  cells of the harvested BMDCs treated with the KALA-OVA-LPs or the R8-OVA-LPs or non-treated BMDCs. At one week after immunization, mice were inoculated with  $8.0 \times 10^5$  cells of E.G7-OVA in the left flank. Tumor volume was measured up to 23 days after inoculation. The plots represent the mean  $\pm$  SEM (n = 4-5).

# Supplementary figure 5.

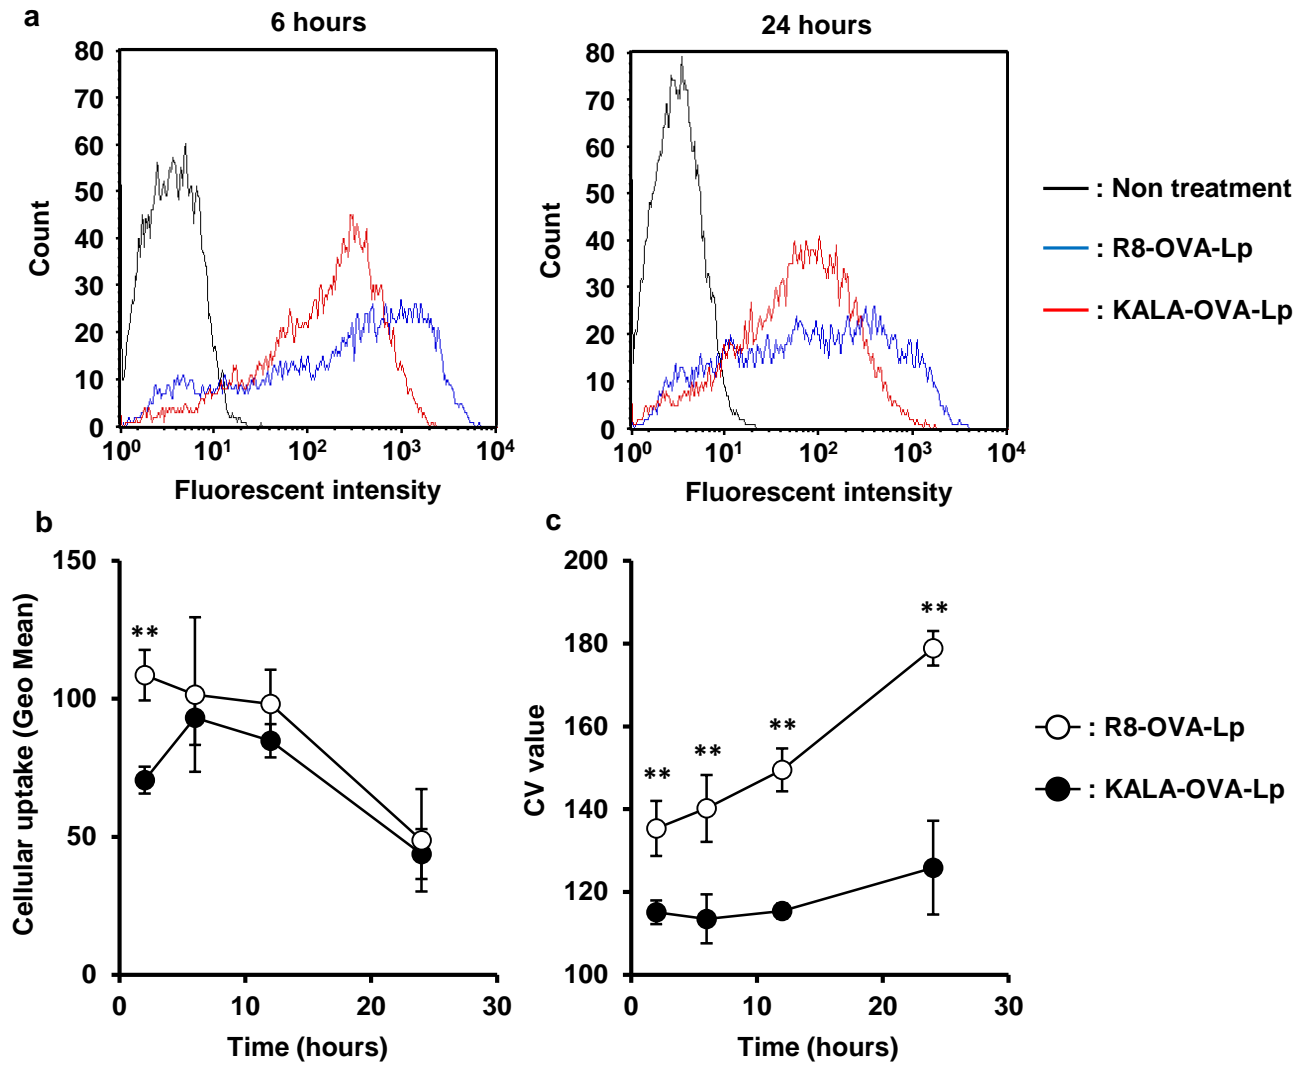

**Supplementary figure 5.** Uptake of KALA-OVA-LPs and R8-OVA-LPs in BMDCs. BMDCs were treated with KALA-OVA-LPs or R8-OVA-LPs encapsulating Alexa Fluor 488-labeled OVA (25% of total OVA) at a lipid dose of 32  $\mu$ M. After 2, 6, 12 or 24 hours, the BMDCs were recovered and measured the fluorescent intensity by flowcytometer. (a) Typical histogram of BMDCs treated with KALA-OVA-LPs or R8-OVA-LPs. (b) Average of fluorescence intensity (Geo mean, left) and coefficient variance (CV) value (right). Data are mean  $\pm$  SD (n=3). Statistical analyses were performed by Student's t-test. \*\*P < 0.01.

# Supplementary figure 6.

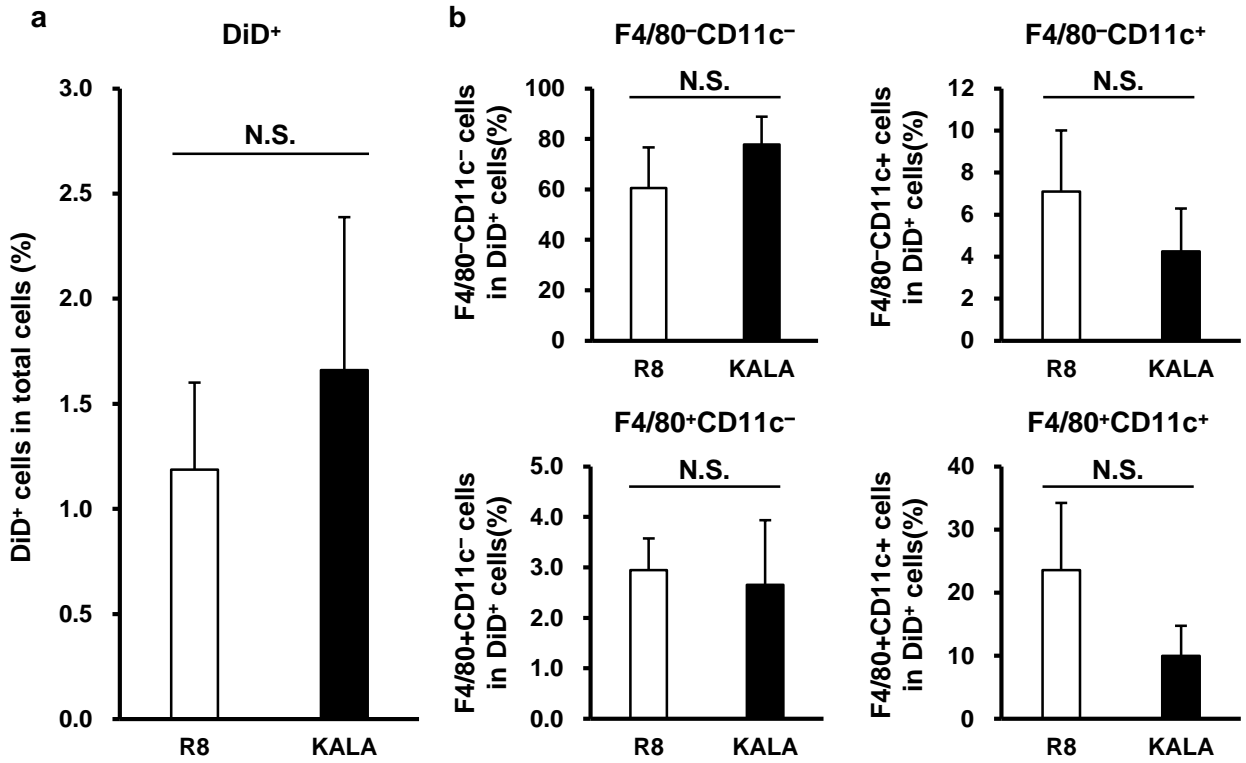

## Supplementary figure 6. Lymph node accumulation of KALA-OVA-LPs and R8-OBA-LPs

C57BL/6 mice were administered subcutaneously with KALA-OVA-LPs, R8-OVA-LP modified with 0.1 mol% DiD at a dose of 25  $\mu$ g OVA in the both side flanks. After 24 hours, the draining lymph nodes (inguinal lymph nodes) were isolated and mashed. Nylon mesh-filtered cell suspension were analyzed by flow cytometry for uptake of the fluorescently-labeled liposomes and expression of F4/80 and CD11c. Data are mean + SEM (n=3). Statistical analyses were performed by Student's t-test. N.S.: Not significant.
